# Supplementary material for: Analysis of the Content and Comprehensiveness of Dermatology Residency Training Websites in Taiwan
Source: MDPI journal article supplement (doi:10.3390/healthcare9060773), 2021-06-21
Supplement: s1 [file s1]

## Supplementary materials

**Supplement. Table S1.** Dermatology residency websites included in this study.

| Name of Hospital                                            | Public/Private | Website Analyzed                                                                                                                                                                                                                                                                                                                         |
|-------------------------------------------------------------|----------------|------------------------------------------------------------------------------------------------------------------------------------------------------------------------------------------------------------------------------------------------------------------------------------------------------------------------------------------|
| Northern Area (13)*                                         |                |                                                                                                                                                                                                                                                                                                                                          |
| Keelung Chang Gung Memorial Hospital and Lovers Lake Branch | Private        | <a href="https://www.cgmh.org.tw/tw/Systems/BranchInfo/2/XXXXX/23800">https://www.cgmh.org.tw/tw/Systems/BranchInfo/2/XXXXX/23800</a> (accessed on 20, August, 2020; 22, September, 2020)                                                                                                                                                |
| Taipei Veterans General Hospital                            | Public         | <a href="https://wd.vghtpe.gov.tw/derm/Index.action">https://wd.vghtpe.gov.tw/derm/Index.action</a> (accessed on 20, August, 2020; 22, September, 2020)                                                                                                                                                                                  |
| National Taiwan University Hospital                         | Public         | <a href="https://www.ntuh.gov.tw/derm/Index.action">https://www.ntuh.gov.tw/derm/Index.action</a> (accessed on 20, August, 2020; 22, September, 2020)                                                                                                                                                                                    |
| Tri-service General Hospital                                | Public         | <a href="https://wwwv.tsgh.ndmctsgh.edu.tw/unit/10016/13279">https://wwwv.tsgh.ndmctsgh.edu.tw/unit/10016/13279</a> (accessed on 20, August, 2020; 22, September, 2020)                                                                                                                                                                  |
| Mackay Memorial Hospital                                    | Private        | <a href="http://www.mmh.org.tw/taitam/derma/index-new.html">http://www.mmh.org.tw/taitam/derma/index-new.html</a> (accessed on 20, August, 2020; 22, September, 2020)                                                                                                                                                                    |
| Taipei Municipal Wangfang Hospital†                         | Public         | <a href="https://www.wanfang.gov.tw/p9_medical.aspx?dn=%E5%85%B6%E4%BB%96%E5%B0%88%E7%A7%91&amp;cn=%E7%9A%AE%E8%86%9A%E7%A7%91">https://www.wanfang.gov.tw/p9_medical.aspx?dn=%E5%85%B6%E4%BB%96%E5%B0%88%E7%A7%91&amp;cn=%E7%9A%AE%E8%86%9A%E7%A7%91</a> (accessed on 20, August, 2020; 22, September, 2020)                            |
| Taipei Medical University Hospital                          | Private        | <a href="https://www.tmuh.org.tw/team/team/11/215">https://www.tmuh.org.tw/team/team/11/215</a>                                                                                                                                                                                                                                          |
| Shin Kong Wu Ho Su Memorial Hospital                        | Private        | <a href="https://www.skh.org.tw/skh/d89e980b15.html">https://www.skh.org.tw/skh/d89e980b15.html</a> (accessed on 20, August, 2020; 22, September, 2020)                                                                                                                                                                                  |
| Cathay General Hospital                                     | Private        | <a href="https://www.cgh.org.tw/ec99/rwd1320/category.asp?category_id=452">https://www.cgh.org.tw/ec99/rwd1320/category.asp?category_id=452</a><br><a href="https://tpech.gov.taipei/mp109161/cp.aspx?n=66FFD9FE848887A3&amp;s=FF8E314F302FACC6">https://tpech.gov.taipei/mp109161/cp.aspx?n=66FFD9FE848887A3&amp;s=FF8E314F302FACC6</a> |
| Taipei City Hospital, Renai Branch and Heping Fuyou Branch  | Public         | <a href="https://tpech.gov.taipei/mp109151/cp.aspx?n=D8CE035C19837302">https://tpech.gov.taipei/mp109151/cp.aspx?n=D8CE035C19837302</a> (accessed on 20, August, 2020; 22, September, 2020)                                                                                                                                              |
| Taipei and Linkou Chang Gung Memorial Hospital              | Private        | <a href="https://www1.cgmh.org.tw/branch/lnk/2016/dept2.aspx?deptId=33800">https://www1.cgmh.org.tw/branch/lnk/2016/dept2.aspx?deptId=33800</a> (accessed on 20, August, 2020; 22, September, 2020)                                                                                                                                      |

|                                                                 |         |                                                                                                                                                                                                                                                                                                                                                                                                                                        |
|-----------------------------------------------------------------|---------|----------------------------------------------------------------------------------------------------------------------------------------------------------------------------------------------------------------------------------------------------------------------------------------------------------------------------------------------------------------------------------------------------------------------------------------|
|                                                                 |         | <a href="https://www.cgmh.org.tw/tw/Systems/BranchInfo/1/XXXXX/13800(accessed on 20, August, 2020; 22, September, 2020)"><u>https://www.cgmh.org.tw/tw/Systems/BranchInfo/1/XXXXX/13800(accessed on 20, August, 2020; 22, September, 2020)</u></a>                                                                                                                                                                                     |
| Far Eastern Memorial Hospital                                   | Private | <a href="https://www.femh.org.tw/section/Secbrief.aspx?CID=0240&amp;ReturnUrl=https://bald-headed-wayside.000webhostapp.com/(accessed on 20, August, 2020; 22, September, 2020)"><u>https://www.femh.org.tw/section/Secbrief.aspx?CID=0240&amp;ReturnUrl=https://bald-headed-wayside.000webhostapp.com/(accessed on 20, August, 2020; 22, September, 2020)</u></a>                                                                     |
| Shuang Ho Hospital, Ministry of Health and Welfare <sup>†</sup> | Public  | <a href="https://shh.tmu.edu.tw/page/ShhregTable.aspx?deptCode=11(accessed on 20, August, 2020; 22, September, 2020)"><u>https://shh.tmu.edu.tw/page/ShhregTable.aspx?deptCode=11(accessed on 20, August, 2020; 22, September, 2020)</u></a>                                                                                                                                                                                           |
| Central Area (4)*                                               |         |                                                                                                                                                                                                                                                                                                                                                                                                                                        |
| Taichung Veterans General Hospital                              | Public  | <a href="http://www.vghtc.gov.tw/(X(1)S(gueeqnmmyiwccldmtrzblyn))/PageView/UnitTemplate1?UnitID=7cda4673-6096-4748-a034-3bab9638288c&amp;UnitDefaultTemplate=1(accessed on 20, August, 2020; 22, September, 2020)"><u>http://www.vghtc.gov.tw/(X(1)S(gueeqnmmyiwccldmtrzblyn))/PageView/UnitTemplate1?UnitID=7cda4673-6096-4748-a034-3bab9638288c&amp;UnitDefaultTemplate=1(accessed on 20, August, 2020; 22, September, 2020)</u></a> |
| China Medical University Hospital                               | Private | <a href="https://www.cmu.edu.tw/Department/Detail?depid=77(accessed on 20, August, 2020; 22, September, 2020)"><u>https://www.cmu.edu.tw/Department/Detail?depid=77(accessed on 20, August, 2020; 22, September, 2020)</u></a>                                                                                                                                                                                                         |
| Chung Shan Medical University Hospital                          | Private | <a href="http://web.csh.org.tw/web/a29010/(accessed on 20, August, 2020; 22, September, 2020)"><u>http://web.csh.org.tw/web/a29010/(accessed on 20, August, 2020; 22, September, 2020)</u></a>                                                                                                                                                                                                                                         |
| Changhua Christian Hospital                                     | Private | <a href="http://www2.cch.org.tw/layout_5/about.aspx?id=800(accessed on 20, August, 2020; 22, September, 2020)"><u>http://www2.cch.org.tw/layout_5/about.aspx?id=800(accessed on 20, August, 2020; 22, September, 2020)</u></a>                                                                                                                                                                                                         |
| Southern Area (5)*                                              |         |                                                                                                                                                                                                                                                                                                                                                                                                                                        |
| National Cheng Kung University Hospital                         | Public  | <a href="http://derm.med.ncku.edu.tw/index.php(accessed on 20, August, 2020; 22, September, 2020)"><u>http://derm.med.ncku.edu.tw/index.php(accessed on 20, August, 2020; 22, September, 2020)</u></a>                                                                                                                                                                                                                                 |
| Chi Mei Medical Center                                          | Private | <a href="http://www.chimei.org.tw/main/cmh_department/top/57770_index.html(accessed on 20, August, 2020; 22, September, 2020)"><u>http://www.chimei.org.tw/main/cmh_department/top/57770_index.html(accessed on 20, August, 2020; 22, September, 2020)</u></a>                                                                                                                                                                         |
| Kaohsiung Medical University Chung-Ho Memorial Hospital         | Private | <a href="http://www2.kmuh.org.tw/web/kmuhdept/0900/DeptIntro.aspx(accessed on 20, August, 2020; 22, September, 2020)"><u>http://www2.kmuh.org.tw/web/kmuhdept/0900/DeptIntro.aspx(accessed on 20, August, 2020; 22, September, 2020)</u></a>                                                                                                                                                                                           |
| Kaohsiung Veterans General Hospital                             | Public  | <a href="https://org.vghks.gov.tw/derm/Default.aspx?r=73608461(accessed on 20, August, 2020; 22, September, 2020)"><u>https://org.vghks.gov.tw/derm/Default.aspx?r=73608461(accessed on 20, August, 2020; 22, September, 2020)</u></a>                                                                                                                                                                                                 |
| Kaohsiung Chang Gung Memorial Hospital                          | Private | <a href="https://www.cgmh.org.tw/tw/Systems/BranchInfo/8/XXXXX/83800(a)"><u>https://www.cgmh.org.tw/tw/Systems/BranchInfo/8/XXXXX/83800(a)</u></a>                                                                                                                                                                                                                                                                                     |

ccessed on 20, August, 2020; 22,  
September, 2020)

---

Eastern Area (1) \*

---

Hualien Tzu Chi Hospital

Private

<https://hlm.tzuchi.com.tw/dermat/>  
(accessed on 20, August, 2020; 22,  
September, 2020)

---

\*The hospitals were divided into four areas (i.e., northern, central, southern and eastern), according to location, Council for Economic Planning and Development, Executive Yuan. †The Taipei Municipal Wangfang Hospital; Shuang Ho Hospital, Ministry of Health and Welfare were regarded as public hospitals even if these were managed by the Taipei Medical University.
